# Supplementary material
Source: PubMed Central journal article supplement (PMC3387721)
Supplement: supp_pp.112.196337_196337Figure_S1.pdf [file supp_pp.112.196337_196337Figure_S1.pdf]

# Figure S1

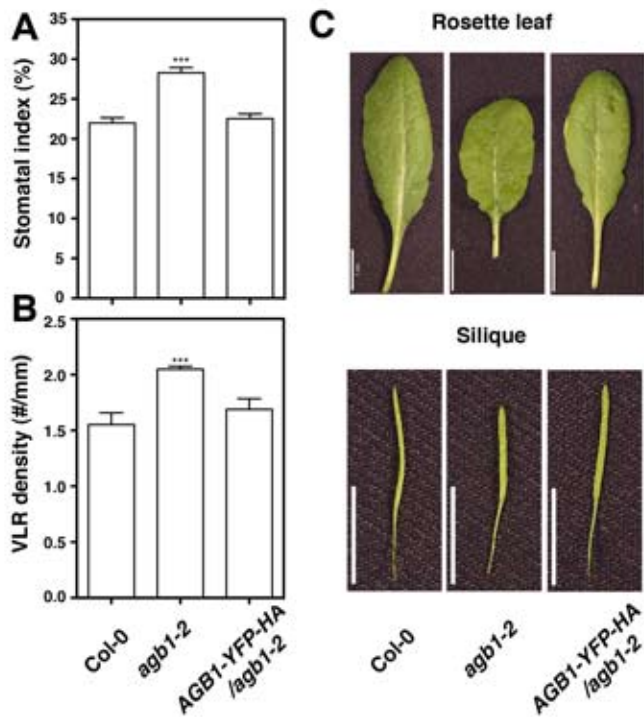

Figure S1. Phenotypic analysis on the *35S:AGB1-YFP-HA/agb1-2* complementation line.

A, Stomatal index on the abaxial epidermis of cotyledons from 9-day-old seedlings (n=20). B, Density of visible lateral roots (VLR) of 10-day-old seedlings (n=30). C, Comparison of fully expanded rosette leaves and siliques of plants. Values in A and B are mean  $\pm$ SE. \*Significant difference from wild-type plants (\*\* $p < 0.001$ ). Scale bars in C = 1 cm.
