# Supplementary material
Source: PubMed Central journal article supplement (PMC3387721)
Supplement: supp_pp.112.196337_196337Figure_S2.pdf [file supp_pp.112.196337_196337Figure_S2.pdf]

# Figure S2

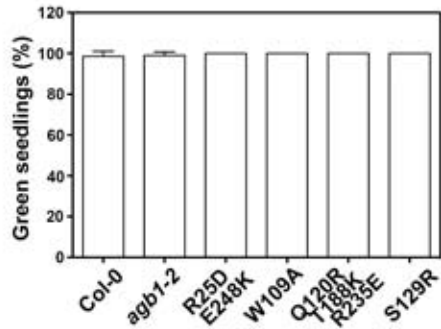

Figure S2. Osmotic control for the glucose-sensing assay.

WT, *agb1-2*, and transgenic plants were grown a low 2% mannitol (w/v) medium. The percentages of green seedlings were scored after 10 days grown at 23°C. The experiment was repeated three times and data were averaged. The error bars represent SD.
