# Supplementary material
Source: PubMed Central journal article supplement (PMC3387721)
Supplement: supp_pp.112.196337_196337Figure_S3.pdf [file supp_pp.112.196337_196337Figure_S3.pdf]

**Figure S3**

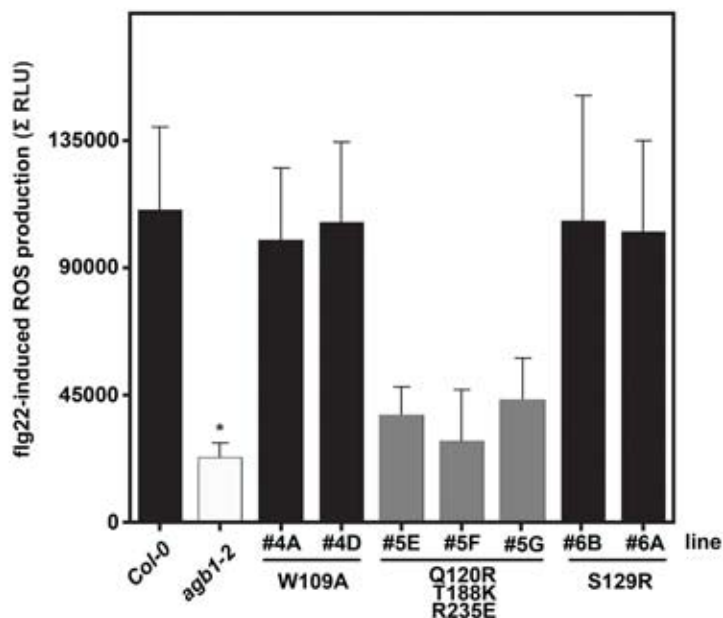

Figure S3. Accumulation of ROS following fig22 treatment.

Leaf discs from 4- to 5-week old plants were treated with 1  $\mu$ M fig22 and ROS formation was measured as relative light units (RLU) in a chemiluminescence assay during a time course of 38 min after fig22 application. Fig22-induced ROS production in the indicated genotypes (multiple independent lines for each AGB1 variant) is represented as the integrated area under the ROS curve measured and referred to as  $\Sigma$  RLU. The grey scale of bars indicates the extent to which a phenotype was rescued (black = totally rescued, grey = partially rescued, white = not rescued). Data for wild-type plants are plotted in black and those for *agb1-2* mutants are plotted in white. Results are presented as mean  $\pm$  SE of at least four independent experiments with four to twelve leaf discs per genotype. The asterisk indicates a statistically significant difference ( $p < 0.05$ ; Student's *t*-test) compared to Col-0.
